# Supplementary material for: Dem Fachkräftemangel das Handwerk legen
Source: Atypon-hosted journal article supplement (doi:10.1026/0932-4089/a000380), 2021-11-22
Supplement: 0932-4089_a000380_esm1.pdf [file 0932-4089_a000380_esm1.pdf]

## ESM 1.

**Tabelle E1.** Arbeitsmerkmale in MotivSORT und deren Entsprechungen im JCM, WDQ und weiteren Theorien und Modellen der (Arbeits-)Psychologie

| Arbeitsmerkmal in MotivSORT               | Entsprechung im JCM                    | Entsprechung im WDQ                        | weitere Theorien und Modelle                                                                                                                                                                                                                  |
|-------------------------------------------|----------------------------------------|--------------------------------------------|-----------------------------------------------------------------------------------------------------------------------------------------------------------------------------------------------------------------------------------------------|
| Bezahlung                                 | -                                      | -                                          | <input type="checkbox"/> Distributive Gerechtigkeit (Adams, 1965; Folger & Konovsky, 1989)<br><input type="checkbox"/> Zwei-Faktoren-Theorie: Kontextfaktoren (Herzberg et al., 1959)                                                         |
| Bonusleistungen                           | -                                      | -                                          | <input type="checkbox"/> Distributive Gerechtigkeit (Adams, 1965; Folger & Konovsky, 1989)<br><input type="checkbox"/> Zwei-Faktoren-Theorie: Kontextfaktoren (Herzberg et al., 1959)                                                         |
| Persönliche Weiterbildung und Entwicklung | Bedürfnis nach persönlicher Entfaltung | -                                          | <input type="checkbox"/> Leistungsmotiv (McClelland, 1953)<br><input type="checkbox"/> Persönlichkeitsförderlichkeit (Hacker & Richter, 1984)                                                                                                 |
| Kollegialität und Unterstützung           | -                                      | Soziale Unterstützung                      | <input type="checkbox"/> Anschlussmotiv (Heyns et al., 1958)<br><input type="checkbox"/> Bedürfnis nach sozialer Verbundenheit (Deci, Olafsen & Ryan; 2017)                                                                                   |
| Familiäre Atmosphäre                      | -                                      | Soziale Unterstützung                      | <input type="checkbox"/> Anschlussmotiv (Heyns et al., 1958)<br><input type="checkbox"/> Bedürfnis nach sozialer Verbundenheit (Deci, Olafsen & Ryan; 2017)                                                                                   |
| Sicherheit und Gesundheitsschutz          | -                                      | Kontextuelle Merkmale, vor allem Ergonomie | <input type="checkbox"/> Zwei-Faktoren-Theorie: Kontextfaktoren (Herzberg et al., 1959)<br><input type="checkbox"/> Ausführbarkeit und Schädigungslosigkeit (Hacker & Richter, 1984)                                                          |
| Arbeitszeit                               | Autonomie                              | Planungs-autonomie                         | <input type="checkbox"/> Work-Life-Balance (z.B. Interrollenkonflikttheorie, Greenhaus & Beutell, 1985; Resource-Drain-Theory, Frone et al., 1997)<br><input type="checkbox"/> Zwei-Faktoren-Theorie: Kontextfaktoren (Herzberg et al., 1959) |
| Arbeitswege                               | -                                      | -                                          | <input type="checkbox"/> Work-Life-Balance (z.B. Interrollenkonflikttheorie, Greenhaus & Beutell, 1985; Resource-Drain-Theory, Frone et al., 1997)<br><input type="checkbox"/> Zwei-Faktoren-Theorie: Kontextfaktoren (Herzberg et al., 1959) |

| Arbeitsmerkmal in MotivSORT                      | Entsprechung im JCM       | Entsprechung im WDQ                                 | weitere Theorien und Modelle                                                                                                                                                                                                                                                                                                                                                                                                                                                    |
|--------------------------------------------------|---------------------------|-----------------------------------------------------|---------------------------------------------------------------------------------------------------------------------------------------------------------------------------------------------------------------------------------------------------------------------------------------------------------------------------------------------------------------------------------------------------------------------------------------------------------------------------------|
| Ruf der Firma                                    | -                         | -                                                   | <input type="checkbox"/> Theorie der sozialen Identität (Tajfel & Turner, 2004)                                                                                                                                                                                                                                                                                                                                                                                                 |
| Offener Fehlerumgang und Kritikfähigkeit im Team | -                         | Rückmeldung durch andere                            | <input type="checkbox"/> Modell der sozialen Unterstützung in Teams (Hüffmeier & Hertel, 2011)                                                                                                                                                                                                                                                                                                                                                                                  |
| Eigenes Spezialgebiet                            | Aufgaben-geschlossenheit  | Ganzheitlichkeit, Spezialisierung                   | <input type="checkbox"/> Bedürfnis nach Kompetenz (Deci, Olafsen & Ryan; 2017)<br><input type="checkbox"/> Zwei-Faktoren-Theorie: Kontentfaktoren (Herzberg et al. 1959)                                                                                                                                                                                                                                                                                                        |
| Persönliches Feedback durch Vorgesetzte          | -                         | Rückmeldung durch andere                            | <input type="checkbox"/> Feedback-Interventions-Theorie (Kluger & DeNisi, 1996)<br><input type="checkbox"/> Modell des umfassenden Führungsverhaltens (Bass & Avolio, 1990)                                                                                                                                                                                                                                                                                                     |
| Eigener Kundenkontakt                            | Bedeutsamkeit der Aufgabe | Interaktion außerhalb der Organisation, Wichtigkeit | <input type="checkbox"/> Persönlichkeits- und lernförderliche Arbeitsgestaltung, z.B. Sinnhaftigkeit, Möglichkeiten der sozialen Interaktion (Ulich, 2011)                                                                                                                                                                                                                                                                                                                      |
| Eigenverantwortung                               | Autonomie                 | Autonomie: Planung, Entscheidung, Methoden          | <input type="checkbox"/> Bedürfnis nach Autonomie (Deci, Olafsen & Ryan; 2017)<br><input type="checkbox"/> Handlungsregulationstheorie (Hacker, 2005)<br><input type="checkbox"/> Zwei-Faktoren-Theorie: Kontentfaktoren (Herzberg et al. 1959)<br><input type="checkbox"/> Handlungs- und Tätigkeitsspielraum (Ulich, 2011)<br><input type="checkbox"/> Anforderungs-Kontroll-Modell (Karasek & Theorell, 1990) bzw. Anforderungs-Ressourcen-Modell (Bakker & Demerouti, 2007) |
| Vielfalt bei der Arbeit                          | Anforderungsvielfalt      | Anforderungsvielfalt, Aufgabenvielfalt              | <input type="checkbox"/> Handlungsregulationstheorie (Hacker, 2005)<br><input type="checkbox"/> Zwei-Faktoren-Theorie: Kontentfaktoren (Herzberg et al. 1959)                                                                                                                                                                                                                                                                                                                   |

*Anmerkungen:* JCM – Job Characteristics Model (Hackman & Oldham, 1980), WDQ – Work Design Questionnaire (Morgeson & Humphrey, 2006)

## Literatur

Adams, J. S. (1965). Inequity in social exchange. *Advances in Experimental Social Psychology*, 2, 267–299.

Bakker, A. B., & Demerouti, E. (2007). The job demands-resources model: State of the art. *Journal of Managerial Psychology*, 22(3), 309–328.

Bass, B. M. & Avolio, B. (1990). Transformational leadership development. Manual for the multifactor leadership questionnaire. Consulting Psychologists.

Deci, E. L., Olafsen, A. H. & Ryan, R. M. (2017). Self-Determination Theory in Work Organizations: The State of a Science. *Annual Review of Organizational Psychology and Organizational Behavior*, 4(1), 19–43. <https://doi.org/10.1146/annurev-orgpsych-032516-113108>

Folger, R. & Konovsky, M. (1989). Effects of procedural and distributive justice on reactions to pay raise decisions. *Academy of Management Journal*, 32, 115-130.

Frone, M.R., Yardley, J.K. & Markle, K.S. (1997). Developing and testing an integrative model of work-family interface. *Journal of Vocational Behavior*, 50, 145-167.

Greenhaus, J. & Beutell, N. (1985). Source of Conflict Between Work and Family Roles. *The Academy of Management Review*, 10, 76–88. <https://doi.org/10.2307/258214>

Hacker, W. (2005). Allgemeine Arbeitspsychologie. Psychische Regulation von Wissens-, Denk- und körperlicher Arbeit (2. Aufl.). Bern: Huber.

Hacker, W. & Richter, P. (1984). Psychische Fehlbeanspruchung. Psychische Ermüdung, Monotonie, Sättigung, Stress. Berlin: Deutscher Verlag der Wissenschaften.

Hackman, J. R. & Oldham, G. R. (1980). Work redesign. Addison-Wesley.

Herzberg, F., Mausner, B. & Snyderman, B. B. (1959). *The motivation to work*. New York: John Wiley & Sons.

- Heyns, R. W., Veroff, J. & Atkinson, J. W. (1958). A scoring manual for the affiliation motive. In J. W. Atkinson (Hrsg.), *Motives in fantasy, action, and society* (S. 205–218). Princeton, NJ: Van Nostrand.
- Hüffmeier, J. & Hertel, G. (2011). Many cheers make light the work: How social support triggers process gains in teams. *Journal of Managerial Psychology*, 26(3), 185–204. United Kingdom: Emerald Group Publishing Limited. <https://doi.org/10.1108/02683941111112631>
- Karasek, R. A., & Theorell, T. (1990). *Healthy work*. New York, NY: Basic Books.
- Kluger, A. N. & DeNisi, A. (1996). The effects of feedback interventions on performance: A historical review, a meta-analysis, and a preliminary feedback intervention theory. *Psychological Bulletin*, 119, 254–284.
- McClelland, D. C. (1953). *The achievement motive*. New York: Appleton-Century-Crofts (Irvington/Wiley).
- Morgeson, F. P. & Humphrey, S. E. (2006). The Work Design Questionnaire (WDQ): developing and validating a comprehensive measure for assessing job design and the nature of work. *The Journal of applied psychology*, 91(6), 1321–1339. <https://doi.org/10.1037/0021-9010.91.6.1321>
- Tajfel, H. & Turner, J. C. (2004). *The Social Identity Theory of Intergroup Behavior* (Political psychology: Key readings) (S. 293). New York, NY, US: Psychology Press. <https://doi.org/10.4324/9780203505984-16>
- Ulich, E. (2011). *Arbeitspsychologie* (7. Aufl.). Stuttgart: Schäffer-Poeschel.
