# Supplementary material for: Dem Fachkräftemangel das Handwerk legen
Source: Atypon-hosted journal article supplement (doi:10.1026/0932-4089/a000380), 2021-11-22
Supplement: 0932-4089_a000380_esm2.pdf [file 0932-4089_a000380_esm2.pdf]

## ESM 2. Darstellung eines Betriebsmonitors

Abbildung E1. Betriebsmonitor

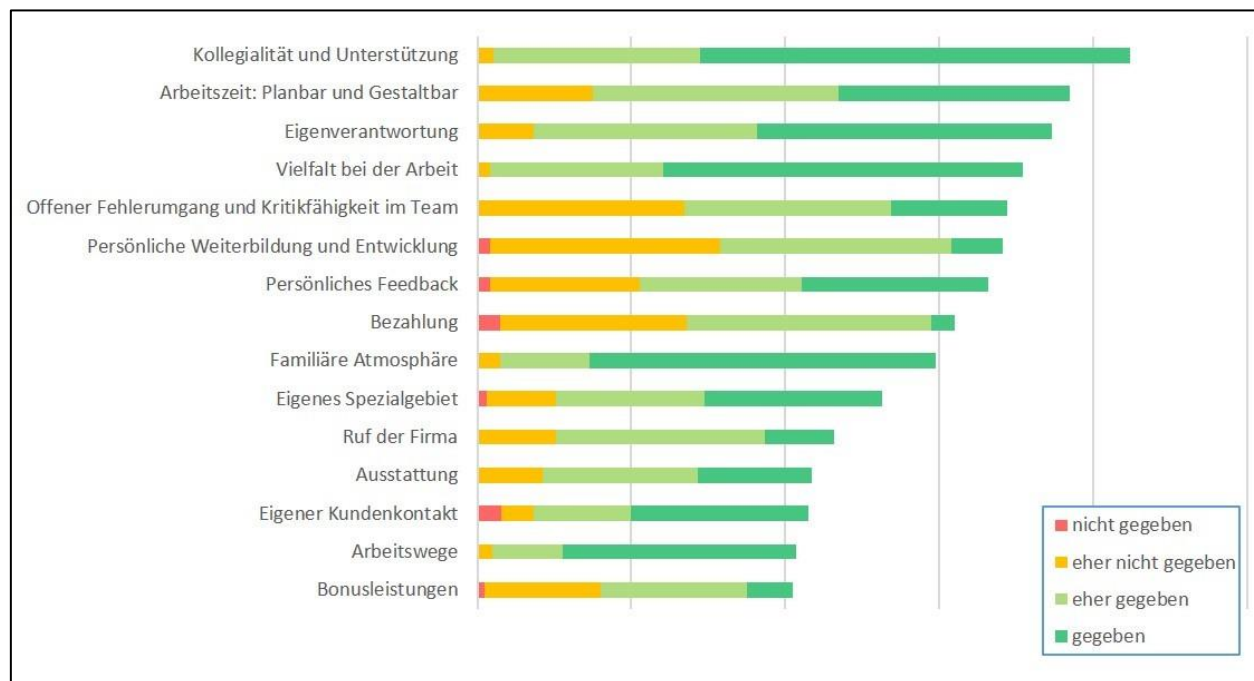

*Anmerkung:* Die Wichtigkeitsbewertungen der Arbeitsmerkmale werden über alle Mitarbeitenden gemittelt, sodass das im Mittel wichtigste Arbeitsmerkmal oben steht. Die Länge der Balken zeigt ebenso die Wichtigkeit an. Die farbbasierten Rückmeldungen zur Gegebenheit der Arbeitsmerkmale werden unbearbeitet übertragen, um unterschiedliche Wahrnehmungen der Mitarbeitenden weiterhin sichtbar zu lassen. In der Implementierung im Handwerk Rheinland-Pfalz wurde MotivSORT mittels Betriebsmonitor standardmäßig zur Arbeitsanalyse auf organisationaler Ebene eingesetzt, um evidenzbasierte und akzeptanzfähige Anpassungs- und Optimierungsprozesse auf Unternehmensebene abzuleiten und durchzuführen. Beispielsweise hat ein Betrieb aus dem Gesundheitshandwerk die Erkenntnisse genutzt, um regelmäßige Arbeitsbesprechungen und

eine vertrauliche und konstruktive Feedbackkultur einzuführen sowie Arbeitszeiten flexibler und das bestehende Bonussystem transparenter zu gestalten.
