# Supplementary material for: Dem Fachkräftemangel das Handwerk legen
Source: Atypon-hosted journal article supplement (doi:10.1026/0932-4089/a000380), 2021-11-22
Supplement: 0932-4089_a000380_esm3.pdf [file 0932-4089_a000380_esm3.pdf]

### ESM 3. Verwendete Skalen zur Erfassung von Akzeptanz und Validität

Nachfolgend werden die Skalen zur Erfassung von Akzeptanz, Kriteriumsvalidität und Konvergenzvalidität vorgestellt. Die Bewertung der Aussagen erfolgte, wenn nicht anders vermerkt, auf einer bipolaren, sechsstufigen Bewertungsskala (-3 = trifft überhaupt nicht zu, -2 = trifft nicht zu, -1 = trifft eher nicht zu, 1 = trifft eher zu, 2 = trifft zu, 3 = trifft voll zu).

#### (1) Akzeptanz von MotivSORT (Studie 1)

Wissen über die Akzeptanz einer neuen Technologie, in diesem Fall eines neuen Instruments, ist essentiell für deren weitere Entwicklung, da die Akzeptanz seitens der Nutzenden einen Einfluss auf die tatsächliche Nutzung aufweist (Turner et al., 2010). Auf Grundlage des Technologie-Akzeptanz-Modells (TAM2; Venkatesh & Davis, 2000) wurde jeweils eine Aussage zur wahrgenommenen Nützlichkeit („*Die Methode empfinde ich als nützlich für Mitarbeitergespräche.*“), wahrgenommenen Einfachheit der Nutzung („*Die Methode ist leicht zu benutzen und verständlich.*“), Nutzungsintention („*Wenn es die Möglichkeit gäbe, würde ich gerne diese Methode in unserem Unternehmen nutzen.*“), sozialen Norm bei Führungskräften und Kollegen (zwei Items; „*Die Methode würde auch bei uns im Unternehmen bei den Chefs/Mitarbeitern gut ankommen.*“ und „*Die Methode wäre für unser Unternehmen sehr hilfreich und nützlich, da man über diese Themen sprechen sollte.*“) entwickelt.<sup>1</sup>

#### (2) Kriteriumsvalidität

Zur Überprüfung der Kriteriumsvalidität wurde das arbeitsbezogene Erleben der Mitarbeitenden erhoben. Es wurden affektive (affektive Bindung an die Organisation, Arbeitszufriedenheit), motivationale (emotionale Erschöpfung, Tatkraft) und kognitive Maße

---

<sup>1</sup> Die Erfassung der Akzeptanz sowie der Arbeitszufriedenheit erfolgte mithilfe formative Konstrukte, weshalb an diesen Stellen keine Reliabilitäten berichtet werden können (Eberl, 2004). Die primäre Gütebeurteilung erfolgte in diesen Fällen durch die Analyse der Kollinearität der Indikatoren mittels Variance Inflation Factor (VIF). Für keinen der Indikatoren ist der VIF über dem kritischen Wert von  $VIF = 5$ , weshalb davon auszugehen ist, dass keine Kollinearität vorliegt.

(Abschalten von der Arbeit, Identifikation, subjektive körperliche Gesundheit) sowie Kündigungsabsicht als Verhaltensmaß erhoben.

### *Affektive Maße*

*Affektive Bindung an die Organisation (Studie 1+2).* Die affektive Bindung an die Organisation wurde mithilfe der Subskala „*Organisationales Commitment – affektiv*“ des Fragebogens *Commitment Organisation, Beruf und Beschäftigungsform* erhoben (COBB; Felfe et al., 2014). Die Skala besteht aus fünf Items (Beispielitem: „*Ich empfinde ein starkes Gefühl der Zugehörigkeit zu meiner Organisation.*“). Die Reliabilität der Skala ist in beiden Studien als gut zu bewerten ( $\alpha_1 = .77$ ;  $\alpha_2 = .88$ ).

*Arbeitszufriedenheit (Studie 1+2).* Arbeitszufriedenheit wurde mit einer selbstkonstruierten Skala auf Grundlage des *Arbeitsbeschreibungsbogens (ABB)* von Neuberger und Allerbeck (2014) erhoben. Der ABB erfasst sieben Dimensionen des Arbeitslebens (Kollegen, Vorgesetzter, Tätigkeit, Arbeitsbedingungen, Organisation und Leitung, Entwicklung, Bezahlung). In diesem Projekt wurden nur sechs der sieben Dimensionen verwendet: „Organisation und Leitung“ wurde exkludiert, da aufgrund der geringen Größe der teilnehmenden Betriebe starke inhaltliche Überschneidungen mit der Dimension „Mein Vorgesetzter“ zu vermuten waren. Die Gesamtskala Arbeitszufriedenheit wird mit Blick auf die gewählten Indikatoren formativ erfasst, Kollinearitäten der Indikatoren waren nicht gegeben ( $VIF < 5$ ).

### *Motivationale Maße*

*Emotionale Erschöpfung (Studie 1).* Emotionale Erschöpfung wurde mit drei Items der gleichnamigen Subskala des *Oldenburger Burnout-Inventars* erfasst (OLBI; Demerouti & Nachreiner, 1998). Ein Beispielitem lautet: „*Ich habe bei der Arbeit immer häufiger das Gefühl, emotional ausgelaugt zu sein.*“ Die Reliabilität der Skala ist mit  $\alpha = .89$  als gut zu bewerten.

*Tatkraft (Studie 1 + 2).* Tatkraft wurde mit der deutschen Version der Subskala *Vigor* der *Utrecht Work Engagement Scale – Kurzversion (UWES-9)* (Schaufeli et al., 2006) erhoben. Die Subskala erfasst Tatkraft mit drei Items (Beispielitem: „*Bei meiner Arbeit bin ich voller Energie.*“). Die Reliabilität der Skala kann mit  $\alpha_1 = .86$  bzw.  $\alpha_2 = .77$  als gut bewertet werden.

### *Kognitive Maße*

*Abschalten von der Arbeit (Studie 2).* Abschalten von der Arbeit wurde mit der deutschen Übersetzung des *Recovery Experience Questionnaire (REQ; Sonnentag & Fritz, 2007)* erhoben. Die Skala besteht aus vier Items (Beispielitem: „*In meiner Freizeit vergesse ich meine Arbeit.*“). Die Reliabilität ist mit  $\alpha = .78$  als gut zu bewerten.

*Identifikation (Studie 2).* Identifikation wurde mit einem aus dem Englischen übersetzten Single-Item erhoben („*Ich identifiziere mich mit diesem Betrieb.*“; Postmes et al., 2013).

*Subjektive körperliche Gesundheit (Studie 2).* Die subjektive körperliche Gesundheit wurde mit einem aus dem Englischen übersetzten Single-Item erhoben („*Wie würden Sie Ihre allgemeine körperliche Gesundheit beschreiben?*“; DeSalvo et al., 2006). Das Item wurde analog zur englischen Originalversion auf einer fünfstufigen Skala bewertet ( $1 = \text{schlecht}$ ,  $2 = \text{okay}$ ,  $3 = \text{gut}$ ,  $4 = \text{sehr gut}$ ,  $5 = \text{exzellent}$ ).

### *Verhaltensmaß*

*Kündigungsabsicht (Studie 1 + 2).* Die Kündigungsabsicht wurde in Studie 1 mit einer deutschen Übersetzung der *Turnover Intention Scale* gemessen (*TIS-6; Bothma & Roodt, 2013*). Die Skala bestand aus drei Items (Beispielitem: „*Ich denke darüber nach den Job zu wechseln.*“). Die Reliabilität ist mit  $\alpha = .78$  als gut zu bewerten. In Studie 2 wurde zur Ökonomisierung des Fragebogens ein Single-Item eingesetzt („*Wenn sich eine günstige Gelegenheit bietet, würde ich den Betrieb wechseln.*“)

### *(3) Konvergenzvalidität*

Konvergenzvalidität ist ein Teil der Konstruktvalidität und dient dem Vergleich verschiedener Messmethoden hinsichtlich ihrer Zusammenhänge mit einem zu bewertenden Außenkriterium (Carlson & Herdman, 2012). Die Untersuchung der Konvergenzvalidität stellt eine weitere Möglichkeit dar, die Gültigkeit einer neuen Messmethode zu untersuchen. Zu diesem Zweck wurde in Studie 2 die Erfüllung berufsbezogener Grundbedürfnisse erfasst. Die Erfüllung berufsbezogener Grundbedürfnisse weist metaanalytisch bestätigte Zusammenhänge mit dem Erleben und Verhalten von Mitarbeitenden auf (Ryan & Deci, 2017). Die gefundenen Zusammenhänge entsprechen in Höhe und Richtung den empirisch gefundenen Zusammenhängen der Arbeitsgestaltung mit dem Erleben und Verhalten von Mitarbeitenden, weshalb in Studie 2 ein Vergleich von MotivSORT und der Erfüllung der berufsbezogenen Grundbedürfnisse im Sinne der Konvergenzvalidität durchgeführt wurde.

*Erfüllung berufsbezogener Grundbedürfnisse (Studie 2).* Die Erfüllung berufsbezogener Grundbedürfnisse wurde in Studie 2 mit der *Work-related Basic Need Satisfaction Scale (W-BNS*; van den Broeck et al., 2010) erhoben. Die Reliabilitäten der W-BNS-Subskalen erwiesen sich als gut ( $\alpha_{\text{Autonomie}} = .72$ ;  $\alpha_{\text{Kompetenz}} = .81$ ;  $\alpha_{\text{Verbundenheit}} = .73$ ).

## Literatur

- Bothma, C. F.C. & Roodt, G. (2013). The validation of the turnover intention scale. *SA Journal of Human Resource Management*, 11(1). doi: 10.4102/sajhrm.v11i1.507
- Carlson, K. D. & Herdman, A. O. (2012). Understanding the Impact of Convergent Validity on Research Results. *Organizational Research Methods*, 15(1), 17-32. doi: 10.1177/1094428110392383
- Demerouti, E. & Nachreiner, F. (1998). Zur Spezifität von Burnout für Dienstleistungsberufe: Fakt oder Artefakt? *Zeitschrift für Arbeitswissenschaft*, 50, 82–89.
- DeSalvo, K. B., Fisher, W. P., Tran, K., Bloser, N., Merrill, W. & Peabody, J. (2006). Assessing measurement properties of two single-item general health measures. *Quality of life research: an international journal of quality of life aspects of treatment, care and rehabilitation*, 15(2), 191–201. doi: 10.1007/s11136-005-0887-2
- Felfe, J., Six, B., Schmook, R. & Knorz, C. (2014). Commitment Organisation, Beruf und Beschäftigungsform (COBB). *Zusammenstellung sozialwissenschaftlicher Items und Skalen (ZIS)*. doi: 10.6102/zis9
- Neuberger, O. & Allerbeck, M. (2014). Arbeitszufriedenheit. *Zusammenstellung sozialwissenschaftlicher Items und Skalen (ZIS)*. doi: 10.6102/zis2
- Postmes, T., Haslam, S. A. & Jans, L. (2013). A single-item measure of social identification: reliability, validity, and utility. *The British journal of social psychology*, 52(4), 597–617. doi: 10.1111/bjso.12006
- Ryan, R. M. & Deci, E. L. (2017). *Self-determination theory: Basic psychological needs in motivation, development, and wellness*. New York, NY, US: Guilford Press.

- Schaufeli, W. B., Bakker, A. B. & Salanova, M. (2006). The Measurement of Work Engagement With a Short Questionnaire. *Educational and Psychological Measurement*, 66(4), 701–716. doi: 10.1177/0013164405282471
- Sonnentag, S. & Fritz, C. (2007). The Recovery Experience Questionnaire: Development and Validation of a Measure for Assessing Recuperation and Unwinding from Work. *Journal of occupational health psychology*, 12(3), 204–221.
- van den Broeck, A., Vansteenkiste, M., Witte, H., Soenens, B. & Lens, W. (2010). Capturing autonomy, competence, and relatedness at work: Construction and initial validation of the Work-related Basic Need Satisfaction scale. *Journal of Occupational and Organizational Psychology*, 83(4), 981–1002. doi: 10.1348/096317909X481382
- Venkatesh, V. & Davis, F. (2000). A theoretical extension of the technology acceptance model: Four longitudinal field studies. *Management Science*, 46, 186–204.
