# Supplementary material for: Dem Fachkräftemangel das Handwerk legen
Source: Atypon-hosted journal article supplement (doi:10.1026/0932-4089/a000380), 2021-11-22
Supplement: 0932-4089_a000380_esm4.pdf [file 0932-4089_a000380_esm4.pdf]

#### ESM 4.

**Tabelle E2.** Bewertung der Akzeptanz von MotivSORT seitens der Mitarbeitenden

| Dimension                             | Min | Max | <i>M</i> ( <i>SD</i> ) | $\tilde{x}$ | <i>D</i> | rel. Häufigkeit<br>der positiven<br>Bewertung |
|---------------------------------------|-----|-----|------------------------|-------------|----------|-----------------------------------------------|
| Wahrgenommene Nützlichkeit            | -1  | 3   | 1.84 (0.73)            | 2           | 2        | 98.0%                                         |
| Wahrgenommene Einfachheit der Nutzung | -1  | 3   | 2.40 (0.80)            | 3           | 3        | 98.0%                                         |
| Subjektive Norm – Führungskräfte      | -1  | 3   | 1.88 (0.91)            | 2           | 2        | 96.1%                                         |
| Subjektive Norm – Mitarbeiter         | -2  | 3   | 1.73 (0.92)            | 2           | 2        | 96.1%                                         |
| Jobrelevanz                           | -2  | 3   | 1.82 (1.38)            | 2           | 3        | 90.2%                                         |
| Nutzungsintention                     | -3  | 3   | 1.65 (1.21)            | 2           | 2        | 92.2%                                         |

*Anmerkungen:*  $N = 51$ . Min: Minimum. Max: Maximum. *M*: Mittelwert. *SD*:

Standardabweichung.  $\tilde{x}$ : Median. *D*: Modus. Die relative Häufigkeit der positiven Bewertung beschreibt die kumulierte, prozentuale Häufigkeit, mit der die Mitarbeitenden die jeweilige Aussage mit  $1 = \text{Trifft eher zu}$  oder besser bewertet haben. Die Bewertung aller Dimensionen erfolgte auf einer sechsstufigen, bipolaren Bewertungsskala von  $-3 = \text{Trifft überhaupt nicht zu}$  bis  $3 = \text{Trifft voll zu}$ .
